1           **Anti-severe acute respiratory syndrome-related coronavirus 2**  
2           **(SARS-CoV-2) potency of Mefloquine as an entry inhibitor in vitro**

3  
4   Kaho Shionoya<sup>a,b</sup>, Masako Yamasaki<sup>a,b</sup>, Shoya Iwanami<sup>c</sup>, Yusuke Ito<sup>c</sup>, Shuetsu  
5   Fukushi<sup>d</sup>, Hirofumi Ohashi<sup>a,b</sup>, Wakana Saso<sup>a,e,f</sup>, Tomohiro Tanaka<sup>g</sup>, Shin Aoki<sup>h</sup>, Kouji  
6   Kuramochi<sup>b</sup>, Shingo Iwami<sup>c,i,j,k,l</sup>, Yoshimasa Takahashi<sup>m</sup>, Tadaki Suzuki<sup>n</sup>, Masamichi  
7   Muramatsu<sup>a</sup>, Makoto Takeda<sup>o</sup>, Takaji Wakita<sup>a</sup>, Koichi Watashi<sup>a,b,j,p,\*</sup>

8  
9   <sup>a</sup>Department of Virology II, National Institute of Infectious Diseases, Tokyo  
10  162-8640, Japan, <sup>b</sup>Department of Applied Biological Science, Tokyo University of  
11  Science, Noda 278-8510, Japan, <sup>c</sup>Department of Biology, Faculty of Sciences,  
12  Kyushu University, Fukuoka 812-8581, Japan, <sup>d</sup>Department of Virology I, National  
13  Institute of Infectious Diseases, Tokyo 162-8640, Japan, <sup>e</sup>The Institute of Medical  
14  Science, The University of Tokyo, Tokyo 108-8639, Japan, <sup>f</sup>AIDS Research Center,  
15  National Institute of Infectious Diseases, Tokyo 162-8640, Japan, <sup>g</sup>Faculty of  
16  Pharmaceutical Sciences, Tokyo University of Science, <sup>h</sup>Research Institute for  
17  Science and Technology, Tokyo University of Science, <sup>i</sup>MIRAI, JST, Saitama  
18  332-0012, Japan, <sup>j</sup>Institute for the Advanced Study of Human Biology (ASHBi),  
19  Kyoto University, Kyoto 606-8501, Japan, <sup>k</sup>NEXT-Ganken Program, Japanese  
20  Foundation for Cancer Research (JFCR), Tokyo 135-8550, Japan, <sup>l</sup>Science Groove  
21  Inc., Fukuoka 810-0041, Japan, <sup>m</sup>Department of Immunology, National Institute of  
22  Infectious Diseases, Tokyo 162-8640, Japan, <sup>n</sup>Department of Pathology, National  
23  Institute of Infectious Diseases, Tokyo 162-8640, Japan, <sup>o</sup>Department of Virology  
24  III, National Institute of Infectious Diseases, Tokyo 208-0011, Japan, <sup>p</sup>Institute for  
25  Frontier Life and Medical Sciences, Kyoto University, Kyoto 606-8507, Japan.

26  
27  \* **Correspondence:** E-mail: [kwatashi@nih.go.jp](mailto:kwatashi@nih.go.jp) (Koichi Watashi)

30 **Abstract**

31 Coronavirus disease 2019 (COVID-19) has caused serious public health, social,  
32 and economic damage worldwide and effective drugs that prevent or cure  
33 COVID-19 are urgently needed. Approved drugs including Hydroxychloroquine,  
34 Remdesivir or Interferon were reported to inhibit the infection or propagation of  
35 severe acute respiratory syndrome-related coronavirus 2 (SARS-CoV-2), however,  
36 their clinical efficacies have not yet been well demonstrated. To identify drugs  
37 with higher antiviral potency, we screened approved anti-parasitic/anti-protozoal  
38 drugs and identified an anti-malarial drug, Mefloquine, which showed the highest  
39 anti-SARS-CoV-2 activity among the tested compounds. Mefloquine showed  
40 higher anti-SARS-CoV-2 activity than Hydroxychloroquine in VeroE6/TMPRSS2 and  
41 Calu-3 cells, with  $IC_{50} = 1.28 \mu\text{M}$ ,  $IC_{90} = 2.31 \mu\text{M}$ , and  $IC_{99} = 4.39 \mu\text{M}$  in  
42 VeroE6/TMPRSS2 cells. Mefloquine inhibited viral entry after viral attachment to  
43 the target cell. Combined treatment with Mefloquine and Nelfinavir, a replication  
44 inhibitor, showed synergistic antiviral activity. Our mathematical modeling based  
45 on the drug concentration in the lung predicted that Mefloquine administration at a  
46 standard treatment dosage could decline viral dynamics in patients, reduce  
47 cumulative viral load to 7% and shorten the time until virus elimination by 6.1 days.  
48 These data cumulatively underscore Mefloquine as an anti-SARS-CoV-2 entry  
49 inhibitor.

50

51

52 **Keywords:** coronavirus disease 2019, severe acute respiratory syndrome  
53 coronavirus 2, repurposing, malaria, mefloquine, coronavirus

54

## 55 1. Introduction

56 Coronavirus disease 2019 (COVID-19), caused by infection of severe acute  
57 respiratory syndrome-related coronavirus 2 (SARS-CoV-2), has spread into a  
58 worldwide since it was first reported in Wuhan, China in December 2019, and  
59 caused severe damage to public health, the economy, and society in many  
60 countries and areas. Several therapeutic drug candidates, including Remdesivir  
61 (RDV), Hydroxychloroquine (HCQ), Lopinavir and Interferon, have been undergone  
62 clinical trials with drug-repurposing approaches (Touret et al., 2020), of which  
63 treatment efficacies have yet been fully demonstrated. New drug choices for both  
64 therapeutic and prophylactic use against COVID-19 are urgent needs.

65 Chloroquine and its derivative, HCQ, are used clinically as anti-malarial drugs  
66 (Sinha et al., 2014). These drugs (particularly the less toxic HCQ) were expected  
67 to be COVID-19 drug candidates from the early days of the COVID-19 pandemic  
68 (Cortegiani et al., 2020), given their anti-SARS-CoV-2 activity *in vitro* and the  
69 ability to reduce pathogenesis caused by the related coronaviruses, SARS-CoV and  
70 human coronavirus OC43 *in vivo* (Keyaerts et al., 2009; Weston et al., 2020; Wang  
71 et al., 2020; Liu et al., 2020). However, despite over 30 randomized controlled  
72 trials or observational studies in different countries, no consensus demonstrates a  
73 sufficient anti-COVID-19 effect of these drugs (Geleris et al., 2020; Rosenberg et  
74 al., 2020; Tang et al., 2020; Yu et al., 2020a). Therefore, the FDA revoked the  
75 emergency use of chloroquine and HCQ for COVID-19 treatment in June 2020.  
76 The discrepancy between *in vitro* and *in vivo* experimental data and the clinical  
77 outcomes reported to date is not well understood. Possibilities include differences  
78 in drug sensitivities among cell types used in experiments (see 4. Discussion) and  
79 the insufficient potential of anti-SARS-CoV-2 activity of these drugs: The  
80 concentrations of HCQ required for 50% and 90% virus reduction ( $IC_{50}$ ,  $IC_{90}$ ),  
81 determined *in vitro* (i.e., several  $\mu M$ ), is higher than an achievable in plasma value in  
82 clinical settings (1-2  $\mu M$  at the maximum) (McLachlan et al., 1993; Touret et al.,  
83 2020; Liu et al., 2020; Hattori et al., 2020) (see 4. Discussion). Thus, identifying  
84 another drug with a higher antiviral potential at the maximum drug concentration  
85 based on clinical data is a probable approach to improving the treatment efficacy.

86 In this study, from a cell-based functional screening of FDA/EMA/PMDA-approved  
87 anti-parasitic/anti-protozoal drugs, we identified Mefloquine (MFQ), a derivative of  
88 HCQ originally used for anti-malarial therapy and prophylaxis (Sinha et al., 2014),  
89 that has a higher anti-SARS-CoV-2 activity than HCQ in both  
90 Tmprss2-overexpressed VeroE6 cells and human lung-derived Calu-3 cells. MFQ

91 inhibited viral entry process after attachment of the virus to the cell. Importantly,  
92 our mathematical modeling predicted that MFQ administration (1,000 mg, once per  
93 day) could decline viral dynamics in patients to significantly reducing the  
94 cumulative viral load and shortening the period until virus elimination in clinical  
95 concentration ranges. Our data provide foundational evidence that proposes MFQ  
96 as an alternative drug for anti-COVID-19 treatment.

97

98

## 99 **2. Materials and Methods**

100 Information for Materials and Methods are described in *Supplementary*  
101 *Information*.

102

103

## 104 **3. Results**

105 *3.1. Identification of Mefloquine as a potential inhibitor against SARS-CoV-2*  
106 *infection.*

107 In this study, we mainly used VeroE6/TMPRSS2 cells, which is established by  
108 overexpressing transmembrane serine protease 2 (TMPRSS2) in VeroE6 cells (Nao  
109 et al., 2019; Matsuyama et al., 2020), and human lung epithelial-derived Calu-3  
110 cells in a part of experiments, as SARS-CoV-2 infection models. First, we examined  
111 the dose dependency of HCQ for antiviral activity by a cytopathic effect (CPE)  
112 assay: VeroE6/TMPRSS2 cells were inoculated with SARS-CoV-2 at an MOI of 0.001  
113 for 1 h, washed to remove unbound virus, and incubated for an additional 48 h (Fig.  
114 1A). SARS-CoV-2 propagation in the cells exhibited an intensive cytopathic effect  
115 (Fig. 1B, panel b), as reported (Matsuyama et al., 2020). HCQ protected cells  
116 from SARS-CoV-2-induced cytopathology completely at the concentration of 32  
117  $\mu\text{M}$ , remarkably but not completely at 16  $\mu\text{M}$ , and very little at 8  $\mu\text{M}$  (Fig.1B, panels  
118 c-e).

119 Aiming to identify drugs with greater anti-SARS-CoV-2 potential than HCQ, we  
120 employed 5  $\mu\text{M}$  for drug screening, a concentration at which HCQ had no CPE  
121 suppression. As a drug library, we used approved anti-parasitic/anti-protozoal  
122 drugs for following two reasons; 1) In addition to Chloroquine and HCQ, some drugs  
123 such as Ivermectin, Atovaquone and quinoline derivatives were reported to  
124 demonstrate antiviral activities against other RNA viruses (Cifuentes Kottkamp et  
125 al., 2019; DeWald et al., 2019; Mastrangelo et al., 2012; Al-Bari, 2015). 2)

126 Anti-parasitic/anti-protozoal agents generally reach high concentrations (i.e., over  
127  $\mu\text{M}$  ranges) in the plasma in clinical settings (Sinha et al., 2014). We thus screened  
128 27 FDA/EMA/PMDA-approved (or approved in the past)  
129 anti-parasitic/anti-protozoal drugs at 5  $\mu\text{M}$  by the CPE assay (Fig. 1A,  
130 *Supplementary Materials and Methods*). By following the scheme shown in Fig. 1A,  
131 cells at 48 h post-inoculation were fixed, stained with DAPI, and counted to  
132 quantify surviving cell numbers. The graph in Fig. 1C shows survival cell numbers  
133 relative to that of DMSO-treated cells as a control, and survival cell number relative  
134 to that of non-infected cells are shown in Fig. S1. In this screening, HCQ,  
135 Chloroquine and Ivermectin had little effect, while MFQ remarkably protected cells  
136 from the virus-induced CPE, with a more than 57-fold increase in surviving cells  
137 over those of the vehicle control (Fig. 1C).

138 We next compared the antiviral activities of MFQ with that of HCQ and an  
139 additional Chloroquine derivative, Primaquine (PRQ), as a reference.  
140 Cytopathogenicities at 48 h and the viral N protein expression at 24 h after virus  
141 inoculation (a time before showing CPE) were examined during treatment with each  
142 compound at 8  $\mu\text{M}$  (Fig. 1D, E): MFQ completely protected cells from viral  
143 propagation-induced CPE and reduced the production of viral protein (lane 4),  
144 whereas HCQ weakly exerted an antiviral effect (lane 3), and PRQ had little antiviral  
145 effect (lane 5). To examine whether the observed antiviral effects depend on cell  
146 types or are generally reproduced beyond cell types, we used a human lung  
147 epithelial cell line, Calu-3, and found the robust antiviral activity of MFQ against  
148 SARS-CoV-2, in contrast to much lower HCQ activity (Fig. 1F, *Supplementary*  
149 *Materials and Methods*). Therefore, we focused on MFQ as a potential  
150 anti-SARS-CoV-2 drug in subsequent analyses.

151

### 152 *3.2. Antiviral profile of Mefloquine and other quinoline derivatives.*

153 To profile the anti-SARS-CoV-2 activity of compounds, we quantified viral RNA  
154 released into the culture supernatant in addition to cell viability at 24 h after virus  
155 inoculation upon treatment at varying concentrations (0.5, 1, 2, 4, 8 and 16  $\mu\text{M}$ ) of  
156 HCQ, PRQ, MFQ, and other related compounds, Quinine and Quinidine, that possess  
157 a quinoline ring (Fig. 2A–C). The 90% and 99% maximal inhibitory concentrations  
158 ( $\text{IC}_{90}$  and  $\text{IC}_{99}$ ) and 50% maximal cytotoxic concentrations ( $\text{CC}_{50}$ ) are shown. All  
159 the compounds had no remarkably cytotoxicity at any examined concentration (Fig.  
160 2C). HCQ and MFQ demonstrated antiviral activities in a dose-dependent manner,

161 with higher potency for MFQ than HCQ (Fig. 2B). By contrast, PRQ showed  
162 marginal antiviral effects at all concentrations examined, suggesting that the  
163 hydroxyl and amino groups in the side chain of MFQ and/or that the position of the  
164 side chain on the quinoline ring are important for the anti-SARS-CoV-2 activity.  
165 The octanol-water partition coefficient (log P) values of MFQ, HCQ, Quinine,  
166 Quinidine and PRQ were calculated to be 4.34, 2.87, 2.48, 2.4, and 1.47,  
167 respectively (Ghose and Crippen, 1987), which imply that the higher  
168 hydrophobicity of MFQ, possibly due to the two trifluoromethyl groups, may be  
169 related to its high antiviral activity.

170

### 171 *3.3. Mefloquine inhibits the SARS-CoV-2 entry process after virus-cell attachment.*

172 SARS-CoV-2 attaches to target cells by the binding of viral Spike protein to its  
173 receptor, angiotensin-converting enzyme 2 (ACE2). It is then subjected to Spike  
174 cleavage by host proteases, either TMPRSS2 on the plasma membrane or  
175 cathepsins in the endosomes, followed by the membrane fusion and the sorting to  
176 the site of replication (entry phase). Viral RNA then replicates and assembles with  
177 viral structural proteins to produce progeny virus (replication phase) (Fig. 3A)  
178 (Hoffmann et al., 2020; Lebeau et al., 2020).

179 We next addressed which step in the viral life cycle MFQ inhibits by a series of  
180 assays. The time-of-addition analysis, in which compounds are treated at different  
181 times, is used to evaluate the phase of viral entry and replication separately (Wang  
182 et al., 2020). As previously reported (Wang et al., 2020), compounds were  
183 treated at three different time points (Fig. 3B, *Supplementary Materials and*  
184 *Methods*), either throughout the assay (a; whole life cycle, 1 h during virus  
185 inoculation + 24 h after inoculation), for the initial 3 h (b; entry phase, 1 h during  
186 virus inoculation + 2 h after inoculation), or for the last 22 h (c; post-entry phase,  
187 including replication). In this analysis, RDV, a reported replication inhibitor (Wang  
188 et al., 2020), had no inhibitory effect when applied during the initial 3 h (Fig. 3B,  
189 lane 5), but it decreased viral RNA in the post-entry phase (Fig. 3B, lane 6). By  
190 contrast, MFQ remarkably reduced viral RNA levels to under 3% when applied at the  
191 entry phase (Fig. 3B, lane 8), but showed much lower antiviral activity (to 24%)  
192 when treated after the first round of viral entry (Fig. 3B, lane 9). The viral RNA  
193 reduction by MFQ in lane 9 was likely to the inhibition of second round of infection  
194 and thereafter of the produced virus, which occurred during the 22 h. These data  
195 suggest that MFQ inhibits the entry process of SARS-CoV-2.



196 We then evaluated the virus-cell attachment in the presence or absence of MFQ  
197 by incubating cells with the virus at 4°C to allow viral attachment to the cell surface  
198 but not the following processes. After washing the unattached virus and  
199 compounds, we extracted and quantified the viral RNA on the cell surface.  
200 SARS-CoV-2 RNA from virus attached the surface of the cell was drastically  
201 reduced in the presence of heparin, an entry inhibitor for SARS-CoV-2, used as a  
202 positive control (Tandon et al., 2020; Tree et al., 2020), while that was not  
203 affected by MFQ treatment (Fig. 3C). However, MFQ inhibited the  
204 post-attachment phase, ranging from the membrane fusion to virus production (Fig.  
205 3D): Virus-attached cells were prepared by incubation with a large amount of  
206 virus (MOI of 1.5, more than 1,000-fold higher than used in other normal infection  
207 assay) at 4°C for 1 h followed by washing. The cells were transferred to 37°C for  
208 6 h in the presence or absence of compounds to induce membrane fusion and  
209 subsequent steps up to virus secretion, and viral RNA in the supernatant was  
210 quantified. MFQ clearly reduced the viral RNA levels to almost the same as those  
211 when treatment with E-64d, a lysosomal/cytosolic cysteine protease inhibitor  
212 reported to inhibited SARS-CoV-2 entry (Hoffmann et al., 2020; Hu et al., 2020)  
213 (Fig. 3D).

214 We further examined the virus entry using a pseudovirus carrying the Spike  
215 protein derived from SARS-CoV-2 or the envelope proteins of hepatitis C virus  
216 (HCV), another RNA virus unrelated to coronavirus (Fig. 3E, *Supplementary*  
217 *Materials and Methods*). These pseudoviruses can evaluate the entry mediated by  
218 these Spike or envelope proteins (Hoffmann et al., 2020; Bartosch et al., 2003).  
219 The pseudovirus assay showed that SARS-CoV-2 Spike-dependent viral entry was  
220 significantly inhibited by the TMPRSS2 inhibitor Camostat, and by MFQ to similar  
221 levels to those of E-64d (Fig. 3E, left). However, the assay sensitivity itself was  
222 relatively lower than the SARS-CoV-2 infection assay. Meanwhile, HCV  
223 envelope-mediated entry was not affected by MFQ, in contrast to the reduced  
224 entry caused by bafilomycin A1, a reported HCV entry inhibitor (Fig. 3E, right).  
225 These results cumulatively suggest that MFQ inhibited the post-attachment  
226 SARS-CoV-2 Spike-dependent entry process.

227

228 *3.4. Synergistic antiviral activity of combined treatment of Mefloquine with*  
229 *Nelfinavir.*

230 Combination treatment with multiple agents with different modes of action is a  
231 strategy to improve the outcome of antiviral treatments, including those against  
232 human immunodeficiency virus (HIV) and HCV (Koizumi et al., 2017; Shen et al.,  
233 2008). We, therefore, examined the combination of MFQ and a representative  
234 anti-SARS-CoV replication inhibitor, Nelfinavir (NFV) (Yamamoto et al., 2004).  
235 NFV has been suggested to inhibit SARS-CoV-2 replication thorough binding with  
236 the SARS-CoV-2 main protease by docking simulation (Ohashi et al., 2020).  
237 Following the experimental scheme in Fig. 1A, we treated cells with paired  
238 compounds at varying concentrations for 24 h and quantified viral RNA in the  
239 cultured supernatant by real-time RT-PCR in addition to cell viability by a high  
240 content image analyzer (*Supplementary Materials and Methods*). Viral RNA levels  
241 were reduced by a single treatment of either MFQ or NFV in a dose-dependent  
242 manner, and these was further reduced by combination treatment without any  
243 cytotoxicity (Fig. 4A). Bliss independence-based synergy plot showed a  
244 synergistic antiviral effect in wide concentration ranges, especially at higher doses  
245 (Fig. 4B, orange indicates synergistic effect).

246

### 247 *3.5. Mathematical prediction of the Mefloquine treatment in clinical settings.*

248 Clinical pharmacokinetics data for MFQ, including the maximum drug  
249 concentration ( $C_{max}$ ) in the plasma, half-life, area under the curve for drug  
250 concentration, and the distribution to the lung, are reported (Desjardins et al.,  
251 1979; Karbwang and White, 1990; Jones et al., 1994). Mathematical modeling  
252 combined with pharmacokinetics, pharmacodynamics, and the viral dynamics model  
253 described in **Materials and Methods** (Ohashi et al., 2020) predicted the  
254 dynamics of viral load after MFQ administration (1,000 mg, once) in patients (Fig.  
255 5A, red) and the corresponding time-dependent antiviral activity of MFQ (Fig. 5B).  
256 The high antiviral potential and the long half-life of MFQ (more than 400 h)  
257 (Desjardins et al., 1979; Karbwang and White, 1990) were predicted to exert a  
258 continuous antiviral effect and a resulting decline of viral load (Fig. 5A).  
259 Cumulative viral load, which is the area under the curve for the viral load over the  
260 time course, was calculated to be reduced by 6.98% (Fig. 5C). The time until the  
261 viral load declines beneath the detectable level is 15.2 days without treatment, but  
262 it was calculated to be shortened to 9.10 days after MFQ treatment (Fig. 5D).  
263 These analyses predict the effectiveness of MFQ to reduce the viral load at clinical  
264 drug concentrations.

265



266

#### 267 4. Discussion

268 Given the *in vitro* anti-SARS-CoV-2 activity and the *in vivo* effect on the related  
269 coronaviruses (Ko et al., 2020; Weston et al., 2020; Wang et al., 2020; Liu et al.,  
270 2020), Chloroquine and HCQ have been expected to be effective as anti-COVID-19  
271 drugs. However, accumulative data have not provided sufficient evidence  
272 supporting a preferable clinical outcome (Funnell et al., 2020). The  $IC_{50}$ ,  $IC_{90}$  and  
273  $IC_{99}$  for HCQ calculated in this study were 1.94, 7.96 and 37.2  $\mu$ M, respectively,  
274 consistent with the  $IC_{50}$  values at  $\mu$ M ranges examined in other studies (Liu et al.,  
275 2020; Touret et al., 2020; Gendrot et al., 2020; Hattori et al., 2020).  
276 Pharmacokinetics analyses in healthy volunteers receiving oral administration of  
277 200 mg HCQ demonstrated a  $C_{max}$  in the blood of 0.49-0.55  $\mu$ M (McLachlan et al.,  
278 1993), lower than the concentration ranges having significant anti-SARS-CoV-2  
279 activity. These data led us to identify a drug possessing a greater  
280 anti-SARS-CoV-2 potential.

281 SARS-CoV-2 entry requires the initial binding of the viral Spike protein to its cell  
282 surface receptor ACE2, then Spike cleavage by either of the two independent host  
283 proteases, endosomal pH-dependent cathepsin or plasma membrane  
284 pH-independent TMPRSS2 (Hoffmann et al., 2020) (Fig. 3A). Recently, it has been  
285 reported that the sensitivity to viral entry inhibitors such as Chloroquine, HCQ and  
286 a TMPRSS2 inhibitor Camostat depends on cell types, so that recommended not to  
287 rely only on widely used Vero cell line, but to use rather TMPRSS2-complemented  
288 Vero cells, Calu-3 cells or presumably primary respiratory/lung cell culture in an  
289 air-liquid interface system or organoids as a more physiologically relevant model for  
290 airway epithelial cells (Hoffmann et al., 2020; Suzuki et al., 2020). Due to the  
291 poor availability of primary cells, we employed VeroE6/TMPRSS2 and Calu-3 cells in  
292 this study, and discovered that MFQ inhibited the viral entry more potently than  
293 HCQ in these TMPRSS2-expressing cells. Importantly, standard MFQ treatment  
294 given to healthy volunteers achieved a plasma  $C_{max}$  of 4.58  $\mu$ M with a long half-life  
295 (more than 400 h) (Karbwang and White, 1990), which is within concentration  
296 ranges exerting significant anti-SARS-CoV-2 activity *in vitro*. Moreover, it has  
297 been reported that the MFQ concentration in the lung was over 10-fold that of the  
298 blood in MFQ-treated human participants (Jones et al., 1994), expecting an even  
299 higher anti-SARS-CoV-2 effect of MFQ. Our mathematical model analysis (Fig. 5)  
300 quantified this prediction, demonstrating a clear reduction in both cumulative viral  
301 load in patients and the time for viral elimination.

302 The *in vitro* anti-SARS-CoV-2 activity of MFQ itself has been reported (Fan et al.,  
303 2020; Jeon et al., 2020; Gendrot et al., 2020; Weston et al., 2020), however, they  
304 only reported the anti-SARS-CoV-2 activity in a single cell line (Vero or VeroE6  
305 cells) with a single readout (viral RNA or CPE) at only one experimental condition  
306 without mechanistic analysis. In the present study, in addition to the comparing  
307 the activity of MFQ with HCQ and other analogs side-by-side, we characterized the  
308 modes of action and combination treatments. Furthermore, we addressed the  
309 clinical antiviral efficacy of MFQ by mathematical prediction, a significant scientific  
310 novelty. Our time-of-addition, virus-cell attachment, post attachment and  
311 pseudovirus assays suggest that MFQ inhibits the SARS-CoV-2 entry phase after  
312 attachment, including the viral Spike cleavage/membrane fusion and the following  
313 translocation to the replication complex. Detailed analysis of the mode of action is  
314 the object of future studies.

315 A limitation of our study is the use of antiviral profile data in cell culture assays  
316 but without an *in vivo* infection model. To date, SARS-CoV-2 studies have used  
317 models including hACE2-transgenic mice, ferrets, cats, hamsters, nonhuman  
318 primates and mice infected with mouse-adapted SARS-CoV-2 (Bao et al., 2020;  
319 Jiang et al., 2020; Hassan et al., 2020; Sun et al., 2020; Winkler et al., 2020;  
320 Golden et al., 2020; Kim et al., 2020; Shi et al., 2020; Richard et al., 2020; Sia et al.,  
321 2020; Imai et al., 2020; Rogers et al., 2020; Rockx et al., 2020; Gao et al., 2020;  
322 Yu et al., 2020b; Gu et al., 2020). However, except for antibodies or vaccine  
323 candidates, there are very limited reports at present successfully confirming the  
324 reduction of SARS-CoV-2 viral load in these models by treatment with drug  
325 candidates (Park et al., 2020). At this time, however, proposing an additional  
326 treatment choice with significant antiviral evidences is urgently demanded to  
327 combat COVID-19. Interestingly, MFQ showed a synergistic effect combined with  
328 a replication inhibitor for SARS-associated coronavirus, NFV (Yamamoto et al.,  
329 2004; Ohashi et al., 2020) (Fig. 4). These data would prospect better clinical  
330 outcomes by combined drugs with different modes of action, as used with antiviral  
331 therapy against HIV and HCV (Koizumi et al., 2017; Shen et al., 2008). Given the  
332 inhibition of viral entry, MFQ is also expected for prophylactic use. Its long half-life  
333 of approximately 20 days is advantageous for achieving a long-lasting antiviral  
334 state by a single oral administration. Consequently, our analysis highlights the  
335 anti-SARS-CoV-2 potency of MFQ, of which efficacy is expected to be further  
336 evaluated in the future through *in vivo* or clinical testing.

337

338

339 **Acknowledgments**

340 We thank Dr. Shutoku Matsuyama at Department of Virology III of National  
341 Institute of Infectious Diseases in Tokyo and Dr. Shinichi Saito at Faculty of  
342 Sciences Division I of Tokyo University of Science for their technical assistance and  
343 discussion. The retrovirus-based pseudoparticle system and human hepatoma cell  
344 line, HuH-7 cells were kindly provided by Dr. Francois-Loic Cosset at the University  
345 of Lyon and Dr. Francis Chisari at The Scripps Research Institute, respectively.

346

347

348 **Funding**

349 This work was supported by The Agency for Medical Research and Development  
350 (AMED) emerging/re-emerging infectious diseases project (JP19fk0108111,  
351 19fk0108156j0101, 20fk0108179j0101, 20fk0108274j0201); The Japan  
352 Society for the Promotion of Science KAKENHI (JP20H03499); The JST MIRAI  
353 program.

354

355

356 **Competing Interests**

357 No interests

358

359

360 **References**

- 361 Al-Bari MA (2015) Chloroquine analogues in drug discovery: new directions of uses,  
362 mechanisms of actions and toxic manifestations from malaria to multifarious  
363 diseases. *J Antimicrob Chemother* 70(6): 1608-1621.
- 364 Bao L, Deng W, Huang B, et al. (2020) The pathogenicity of SARS-CoV-2 in hACE2  
365 transgenic mice. *Nature* 583(7818): 830-833.
- 366 Bartosch B, Dubuisson J and Cosset FL (2003) Infectious hepatitis C virus  
367 pseudo-particles containing functional E1-E2 envelope protein complexes. *J*  
368 *Exp Med* 197(5): 633-642.
- 369 Cifuentes Kottkamp A, De Jesus E, Grande R, et al. (2019) Atovaquone Inhibits  
370 Arbovirus Replication through the Depletion of Intracellular Nucleotides. *J*  
371 *Virology* 93(11).
- 372 Cortegiani A, Ippolito M, Ingoglia G, et al. (2020) Update I. A systematic review on  
373 the efficacy and safety of chloroquine/hydroxychloroquine for COVID-19. *J*  
374 *Crit Care* 59: 176-190.
- 375 Desjardins RE, Pamplin CL, 3rd, von Bredow J, et al. (1979) Kinetics of a new  
376 antimalarial, mefloquine. *Clin Pharmacol Ther* 26(3): 372-379.
- 377 DeWald LE, Johnson JC, Gerhardt DM, et al. (2019) In Vivo Activity of Amodiaquine  
378 against Ebola Virus Infection. *Sci Rep* 9(1): 20199.
- 379 Fan HH, Wang LQ, Liu WL, et al. (2020) Repurposing of clinically approved drugs for  
380 treatment of coronavirus disease 2019 in a 2019-novel coronavirus-related  
381 coronavirus model. *Chin Med J (Engl)* 133(9): 1051-1056.
- 382 Funnell SGP, Dowling WE, Muñoz-Fontela C, et al. (2020) Emerging preclinical  
383 evidence does not support broad use of hydroxychloroquine in COVID-19  
384 patients. *Nature Communications* 11(1): 4253.
- 385 Gao Q, Bao L, Mao H, et al. (2020) Development of an inactivated vaccine candidate  
386 for SARS-CoV-2. *Science* 369(6499): 77-81.
- 387 Geleris J, Sun Y, Platt J, et al. (2020) Observational Study of Hydroxychloroquine in  
388 Hospitalized Patients with Covid-19. *N Engl J Med* 382(25): 2411-2418.
- 389 Gendrot M, Andreani J, Boxberger M, et al. (2020) Antimalarial drugs inhibit the  
390 replication of SARS-CoV-2: An in vitro evaluation. *Travel Med Infect Dis* 37:  
391 101873.
- 392 Ghose AK and Crippen GM (1987) Atomic physicochemical parameters for  
393 three-dimensional-structure-directed quantitative structure-activity  
394 relationships. 2. Modeling dispersive and hydrophobic interactions. *J Chem*  
395 *Inf Comput Sci* 27(1): 21-35.

- 396 Golden JW, Cline CR, Zeng X, et al. (2020) Human angiotensin-converting enzyme 2  
397 transgenic mice infected with SARS-CoV-2 develop severe and fatal  
398 respiratory disease. *JCI Insight* 5(19).
- 399 Gu H, Chen Q, Yang G, et al. (2020) Adaptation of SARS-CoV-2 in BALB/c mice for  
400 testing vaccine efficacy. *Science* 369(6511): 1603-1607.
- 401 Hassan AO, Case JB, Winkler ES, et al. (2020) A SARS-CoV-2 Infection Model in Mice  
402 Demonstrates Protection by Neutralizing Antibodies. *Cell* 182(3):  
403 744-753.e744.
- 404 Hattori SI, Higshi-Kuwata N, Raghavaiah J, et al. (2020) GRL-0920, an Indole  
405 Chloropyridinyl Ester, Completely Blocks SARS-CoV-2 Infection. *mBio* 11(4).
- 406 Hoffmann M, Kleine-Weber H, Schroeder S, et al. (2020) SARS-CoV-2 Cell Entry  
407 Depends on ACE2 and TMPRSS2 and Is Blocked by a Clinically Proven  
408 Protease Inhibitor. *Cell* 181(2): 271-280.e278.
- 409 Hu J, Gao Q, He C, et al. (2020) Development of cell-based pseudovirus entry assay  
410 to identify potential viral entry inhibitors and neutralizing antibodies against  
411 SARS-CoV-2. *Genes Dis.* Epub ahead of print 2020/08/25. DOI:  
412 10.1016/j.gendis.2020.07.006.
- 413 Imai M, Iwatsuki-Horimoto K, Hatta M, et al. (2020) Syrian hamsters as a small  
414 animal model for SARS-CoV-2 infection and countermeasure development.  
415 *Proc Natl Acad Sci U S A* 117(28): 16587-16595.
- 416 Jeon S, Ko M, Lee J, et al. (2020) Identification of Antiviral Drug Candidates against  
417 SARS-CoV-2 from FDA-Approved Drugs. *Antimicrob Agents Chemother*  
418 64(7).
- 419 Jiang RD, Liu MQ, Chen Y, et al. (2020) Pathogenesis of SARS-CoV-2 in Transgenic  
420 Mice Expressing Human Angiotensin-Converting Enzyme 2. *Cell* 182(1):  
421 50-58.e58.
- 422 Jones R, Kunsman G, Levine B, et al. (1994) Mefloquine distribution in postmortem  
423 cases. *Forensic Sci Int* 68(1): 29-32.
- 424 Karbwang J and White NJ (1990) Clinical pharmacokinetics of mefloquine. *Clin*  
425 *Pharmacokinet* 19(4): 264-279.
- 426 Keyaerts E, Li S, Vijgen L, et al. (2009) Antiviral activity of chloroquine against  
427 human coronavirus OC43 infection in newborn mice. *Antimicrob Agents*  
428 *Chemother* 53(8): 3416-3421.
- 429 Kim YI, Kim SG, Kim SM, et al. (2020) Infection and Rapid Transmission of  
430 SARS-CoV-2 in Ferrets. *Cell Host Microbe* 27(5): 704-709.e702.
- 431 Ko M, Chang SY, Byun SY, et al. (2020). DOI: 10.1101/2020.02.25.965582.

- 432 Koizumi Y, Ohashi H, Nakajima S, et al. (2017) Quantifying antiviral activity  
433 optimizes drug combinations against hepatitis C virus infection. *Proc Natl*  
434 *Acad Sci U S A* 114(8): 1922-1927.
- 435 Lebeau G, Vagner D, Frumence É, et al. (2020) Deciphering SARS-CoV-2 Virologic  
436 and Immunologic Features. *Int J Mol Sci* 21(16).
- 437 Liu J, Cao R, Xu M, et al. (2020) Hydroxychloroquine, a less toxic derivative of  
438 chloroquine, is effective in inhibiting SARS-CoV-2 infection in vitro. *Cell*  
439 *Discov* 6: 16.
- 440 Mastrangelo E, Pezzullo M, De Burghgraeve T, et al. (2012) Ivermectin is a potent  
441 inhibitor of flavivirus replication specifically targeting NS3 helicase activity:  
442 new prospects for an old drug. *J Antimicrob Chemother* 67(8): 1884-1894.
- 443 Matsuyama S, Nao N, Shirato K, et al. (2020) Enhanced isolation of SARS-CoV-2 by  
444 TMPRSS2-expressing cells. *Proc Natl Acad Sci U S A* 117(13): 7001-7003.
- 445 McLachlan AJ, Tett SE, Cutler DJ, et al. (1993) Absorption and in vivo dissolution of  
446 hydroxychloroquine in fed subjects assessed using deconvolution  
447 techniques. *Br J Clin Pharmacol* 36(5): 405-411.
- 448 Nao N, Sato K, Yamagishi J, et al. (2019) Consensus and variations in cell line  
449 specificity among human metapneumovirus strains. *PLoS One* 14(4):  
450 e0215822.
- 451 Ohashi H, Watashi K, Saso W, et al. (2020) Identification of Anti-COVID-19 Agents,  
452 Cepharanthine and Nelfinavir, and Their Potential Usage for Combination  
453 Treatment. DOI: 10.2139/ssrn.3631397.
- 454 Park SJ, Yu KM, Kim YI, et al. (2020) Antiviral Efficacies of FDA-Approved Drugs  
455 against SARS-CoV-2 Infection in Ferrets. *mBio* 11(3).
- 456 Richard M, Kok A, de Meulder D, et al. (2020) SARS-CoV-2 is transmitted via  
457 contact and via the air between ferrets. *Nat Commun* 11(1): 3496.
- 458 Rockx B, Kuiken T, Herfst S, et al. (2020) Comparative pathogenesis of COVID-19,  
459 MERS, and SARS in a nonhuman primate model. *Science* 368(6494):  
460 1012-1015.
- 461 Rogers TF, Zhao F, Huang D, et al. (2020) Isolation of potent SARS-CoV-2  
462 neutralizing antibodies and protection from disease in a small animal model.  
463 *Science* 369(6506): 956-963.
- 464 Rosenberg ES, Dufort EM, Udo T, et al. (2020) Association of Treatment With  
465 Hydroxychloroquine or Azithromycin With In-Hospital Mortality in Patients  
466 With COVID-19 in New York State. *Jama* 323(24): 2493-2502.



- 467 Shen L, Peterson S, Sedaghat AR, et al. (2008) Dose-response curve slope sets  
468 class-specific limits on inhibitory potential of anti-HIV drugs. *Nat Med* 14(7):  
469 762-766.
- 470 Shi J, Wen Z, Zhong G, et al. (2020) Susceptibility of ferrets, cats, dogs, and other  
471 domesticated animals to SARS-coronavirus 2. *Science* 368(6494):  
472 1016-1020.
- 473 Sia SF, Yan LM, Chin AWH, et al. (2020) Pathogenesis and transmission of  
474 SARS-CoV-2 in golden hamsters. *Nature* 583(7818): 834-838.
- 475 Sinha S, Medhi B and Sehgal R (2014) Challenges of drug-resistant malaria. *Parasite*  
476 21: 61.
- 477 Sun J, Zhuang Z, Zheng J, et al. (2020) Generation of a Broadly Useful Model for  
478 COVID-19 Pathogenesis, Vaccination, and Treatment. *Cell* 182(3):  
479 734-743.e735.
- 480 Suzuki T, Itoh Y, Sakai Y, et al. (2020) Generation of human bronchial organoids for  
481 SARS-CoV-2 research. DOI: DOI: 10.1101/2020.05.25.115600.
- 482 Tandon R, Sharp JS, Zhang F, et al. (2020) Effective Inhibition of SARS-CoV-2 Entry  
483 by Heparin and Enoxaparin Derivatives. *J Virol*. Epub ahead of print  
484 2020/11/12. DOI: 10.1128/jvi.01987-20.
- 485 Tang W, Cao Z, Han M, et al. (2020) Hydroxychloroquine in patients with mainly  
486 mild to moderate coronavirus disease 2019: open label, randomised  
487 controlled trial. *Bmj* 369: m1849.
- 488 Touret F, Gilles M, Barral K, et al. (2020) In vitro screening of a FDA approved  
489 chemical library reveals potential inhibitors of SARS-CoV-2 replication. *Sci*  
490 *Rep* 10(1): 13093.
- 491 Tree JA, Turnbull JE, Buttigieg KR, et al. (2020) Unfractionated heparin inhibits live  
492 wild-type SARS-CoV-2 cell infectivity at therapeutically relevant  
493 concentrations. *Br J Pharmacol*. Epub ahead of print 2020/10/31. DOI:  
494 10.1111/bph.15304.
- 495 Wang M, Cao R, Zhang L, et al. (2020) Remdesivir and chloroquine effectively inhibit  
496 the recently emerged novel coronavirus (2019-nCoV) in vitro. *Cell Res*  
497 30(3): 269-271.
- 498 Weston S, Coleman CM, Haupt R, et al. (2020) Broad Anti-coronavirus Activity of  
499 Food and Drug Administration-Approved Drugs against SARS-CoV-2 In Vitro  
500 and SARS-CoV In Vivo. *J Virol* 94(21).

- 501 Winkler ES, Bailey AL, Kafai NM, et al. (2020) SARS-CoV-2 infection of human  
502 ACE2-transgenic mice causes severe lung inflammation and impaired  
503 function. *Nat Immunol* 21(11): 1327-1335.
- 504 Yamamoto N, Yang R, Yoshinaka Y, et al. (2004) HIV protease inhibitor nelfinavir  
505 inhibits replication of SARS-associated coronavirus,. *Biochemical and*  
506 *Biophysical Research Communications*, Volume 318, Issue 3,: 719-725,.
- 507 Yu B, Li C, Chen P, et al. (2020a) Low dose of hydroxychloroquine reduces fatality  
508 of critically ill patients with COVID-19. *Sci China Life Sci* 63(10):  
509 1515-1521.
- 510 Yu J, Tostanoski LH, Peter L, et al. (2020b) DNA vaccine protection against  
511 SARS-CoV-2 in rhesus macaques. *Science* 369(6505): 806-811.
- 512

513 **Figure Legends**

514

515 **Figure. 1. Mefloquine (MFQ) inhibits Severe Acute Respiratory**  
516 **Syndrome-related coronavirus 2 (SARS-CoV-2) propagation. (A)**

517 Schematic representation of the SARS-CoV-2 infection assay. VeroE6/TMPRSS2  
518 cells were inoculated with SARS-CoV-2 (Wk-521 strain) at an MOI of 0.001 for 1 h.  
519 After removing the unbound virus, cells were cultured for 24 h to detect  
520 virus-encoding N protein by immunofluorescence assay (IFA) and immunoblot (IB)  
521 or to detect viral RNA in the culture supernatant by RT-qPCR, or for 48 h to observe  
522 virus-induced cytopathic effect (CPE). Compounds were treated given  
523 throughout the assay. (B) Dose dependency of Hydroxychloroquine (HCQ) on  
524 CPE suppression. VeroE6/TMPRSS2 cells were inoculated with the virus for 1 h.  
525 Removing the unbound virus, cells were cultured with a medium containing the  
526 indicated compounds for 48 h. CPE was observed by microscopy. (C) Screening  
527 of anti-parasitic/protozoal drugs in the cell-based infection assay. Compounds  
528 were administrated at 5  $\mu$ M, at which hydroxychloroquine showed little effect on  
529 CPE. The viability of infected cells was quantified via a high content imaging  
530 analyzer by setting the value for the sample treated with DMSO solvent as 1. MFQ  
531 showed more than 57-fold higher cell viability than DMSO controls. (D, E)  
532 SARS-CoV-2-induced CPE and viral N protein expression upon compound  
533 treatments [DMSO at 0.08%; hydroxychloroquine (HCQ), mefloquine (MFQ), and  
534 primaquine (PRQ) at 8  $\mu$ M]. Red and blue signals of merged images indicate viral N  
535 protein and nucleus, respectively (D, lower). Viral N protein and actin, an internal  
536 control, were detected by immunoblot (E). (F) The anti-SARS-CoV-2 activity of  
537 the indicated compounds in Calu-3 cells, a human lung epithelial cell-derived line.

538

539 **Figure. 2. The anti-SARS-CoV-2 activity of MFQ and its derivatives. (A)**

540 Chemical structures of MFQ and its derivatives. (B) Extracellular SARS-CoV-2  
541 RNA was quantified upon treatment with HCQ, MFQ and related compounds PRQ,  
542 Quinine and Quinidine at varying concentrations. Calculated inhibitory  
543 concentrations of 50%, 90% and 99% maximum ( $IC_{50}$ ,  $IC_{90}$  and  $IC_{99}$ ) for each  
544 compound are as indicated. (C) Cell viability was measured by MTT assay with the  
545 calculated 50% maximal cytotoxic concentration ( $CC_{50}$ ).

546

547 **Figure. 3. MFQ inhibits the SARS-CoV-2 entry process. (A) SARS-CoV-2**

548 life cycle. SARS-CoV-2 infection is initiated with virus attachment to the host cells

549 that involves the cellular receptor, angiotensin converting enzyme 2 (ACE2),  
550 followed by the cleavage of viral Spike (S) proteins by either transmembrane serine  
551 protease (TMPRSS2) on the plasma membrane or cathepsins in the  
552 endosome/lysosome that induces fusion of viral and host membranes. Viral RNA is  
553 translated, processed and replicated to be assembled into progeny virus with viral  
554 structural proteins and released extracellularly. **(B)** Scheme of the time of  
555 addition analysis. Compounds were treated at three different times: **(a) whole**:  
556 throughout the assay for 25 h, **(b) entry**: for the initial 3 h to evaluate the effect  
557 on the viral entry process and **(c) post-entry**: for the last 22 h to evaluate the  
558 effect on viral replication/re-infection. Viral RNA levels in the culture supernatant  
559 are shown in the graph by setting that upon DMSO treatment as 100%. **(C)**  
560 Virus-cell attachment assay. VeroE6/TMPRSS2 cells were exposed to virus at an  
561 MOI of 0.001 at 4°C for 5 min with 50 µM MFQ or 100 U/mL Heparin, a SARS-CoV-2  
562 attachment inhibitor used as a positive control. After washing the unbound virus,  
563 cell surface-attached virus was extracted and quantified by real-time RT-PCR. **(D)**  
564 Post-attachment assay. For evaluating the activity after virus attachment, from  
565 membrane fusion to virus secretion, VeroE6/TMPRSS2 cells preincubated with the  
566 virus at an MOI of 1.5 at 4°C for 1 h to allow virus attachment were treated with  
567 compounds for 6 h at 37°C. Extracellular viral RNA was quantified by RT-qPCR.  
568 E-64d, a cysteine protease inhibitor, was used as a positive control. **(E)**  
569 Pseudovirus assays carrying the SARS-CoV-2 Spike or hepatitis C virus (HCV) E1E2  
570 envelope. In the SARS-CoV-2 pseudovirus assay, Camostat and E-64d were used  
571 as positive controls for inhibiting TMPRSS2 and cysteine protease, respectively (E,  
572 left). Bafilomycin A1 (BFA1), which reported to inhibit HCV entry, was used as a  
573 positive control for HCV pseudovirus assay (E, right).

574

575 **Figure. 4. MFQ shows synergistic anti-SARS-CoV2 activity with**  
576 **replication inhibitor NFV. (A)** Viral RNAs in the culture supernatant at 24 h  
577 after co-treatment with MFQ and NFV were quantified by real-time RT-PCR.  
578 Relative values are shown of viral RNA or cell viability to those treated with DMSO  
579 control. Cell viability was simultaneously measured with a high content image  
580 analyzer. [MFQ at 0, 0.83, 1.08, 1.40, 1.82 and 2.37 µM (1.3-fold-dilution); NFV  
581 at 0, 2.20, 2.64 and 3.17 µM (1.2-fold-dilution)]. **(B)** The three-dimensional  
582 interaction landscapes of NFV and MFQ were evaluated with the Bliss independence  
583 model. Orange, white and dark-blue colors on the contour plot indicate synergy,  
584 additive and antagonism, respectively.

585

586 **Figure. 5. Prediction of the impact of MFQ treatment on SARS-CoV-2**  
587 **dynamics in clinical settings. (A, B)** The predicted viral load dynamics  
588 without (A, black) or upon MFQ administration (1,000mg oral, once per day) (A,  
589 red) and the time-dependent antiviral activity of MFQ (B) predicted by  
590 pharmacokinetics/pharmacodynamics/viral-dynamics (PK/PD/VD) models. (C,  
591 D) The cumulative viral load calculated as the area under the curve in (A) and the  
592 duration of virus shedding (days) [time from symptom onset to the day achieving a  
593 viral load under the detection limit (black horizontal line) in (A)] were evaluated for  
594 nontreatment (black) or MFQ treatment (red).

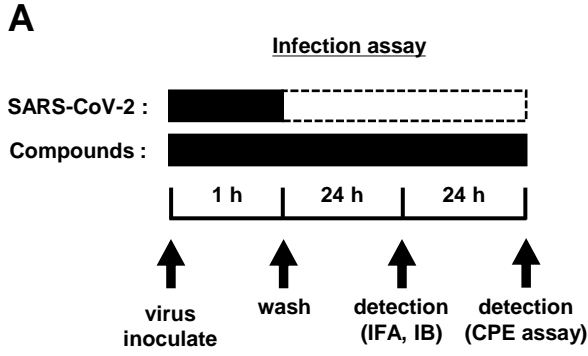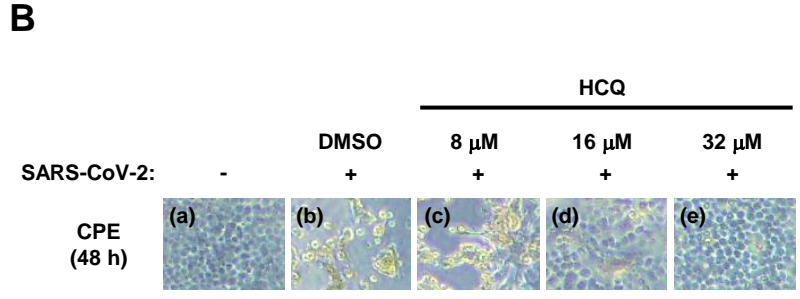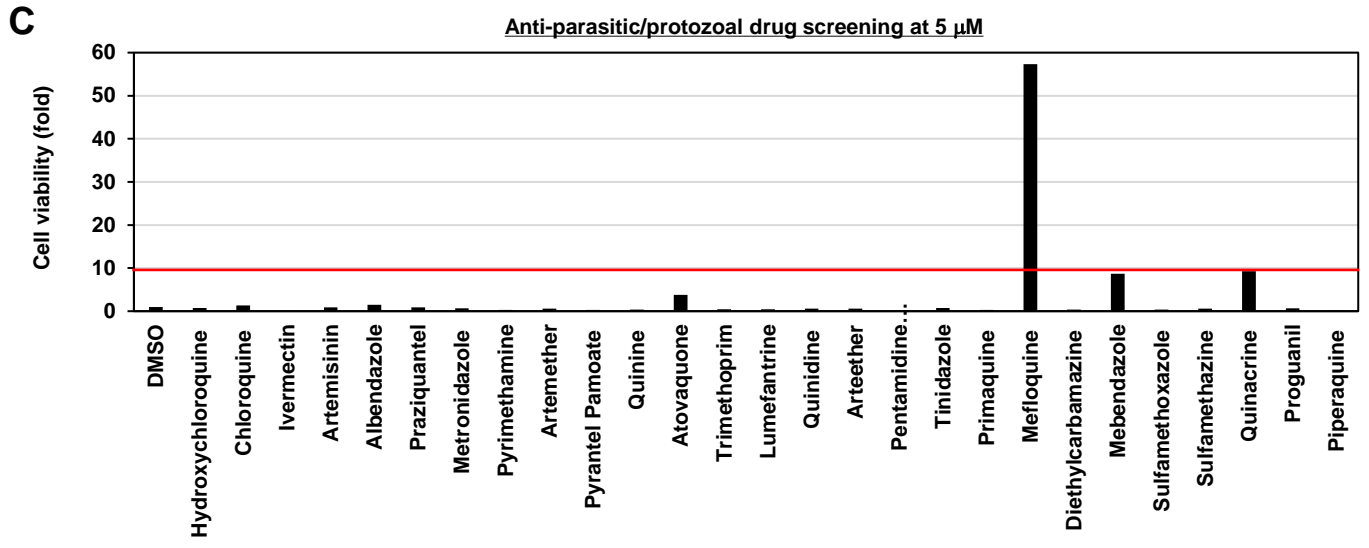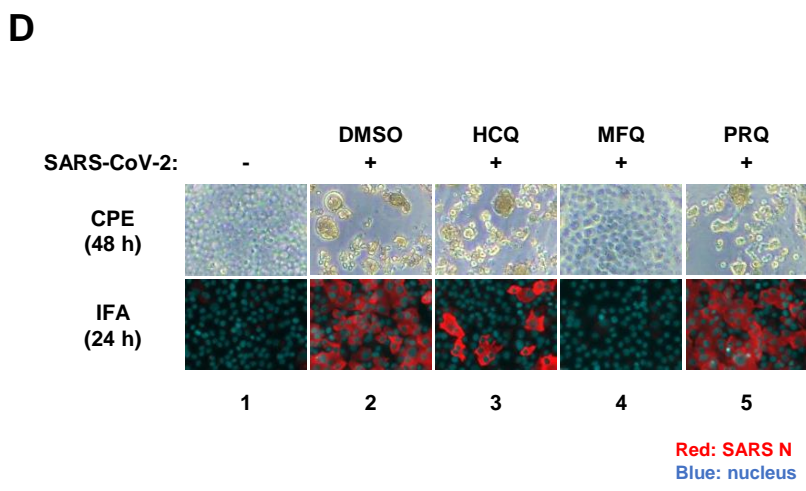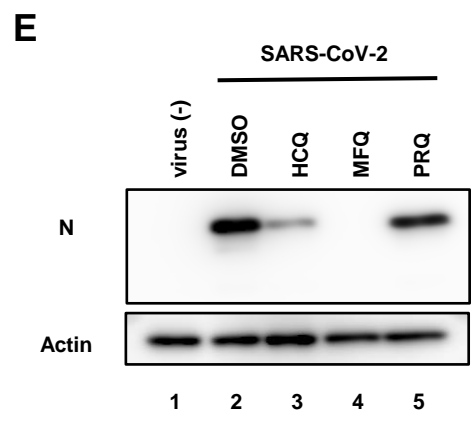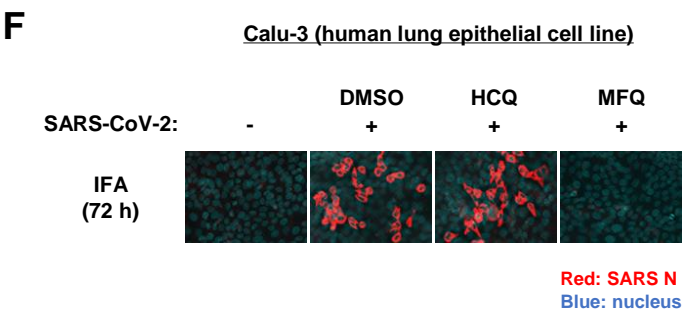



**A**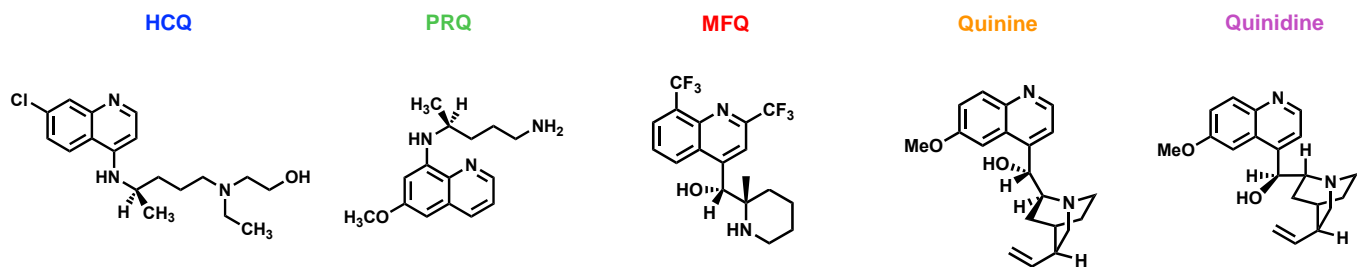**B****SARS-CoV-2 RNA**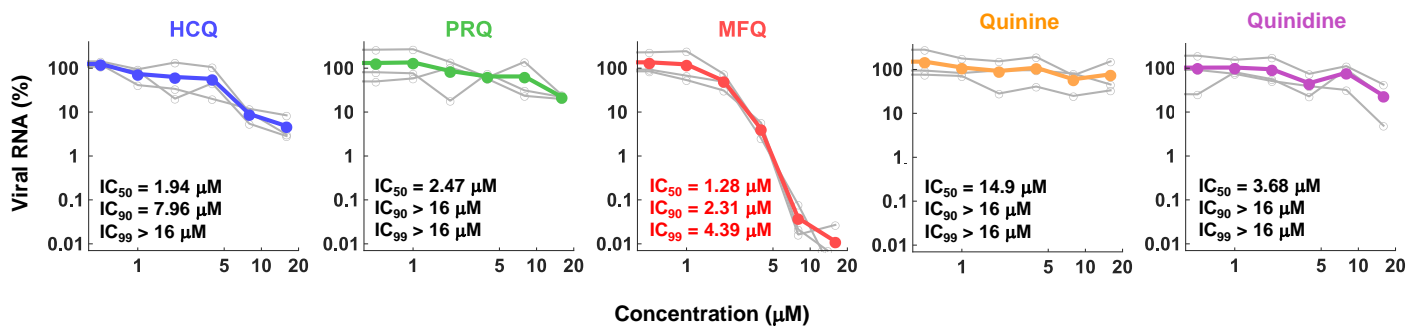**C****Cell viability**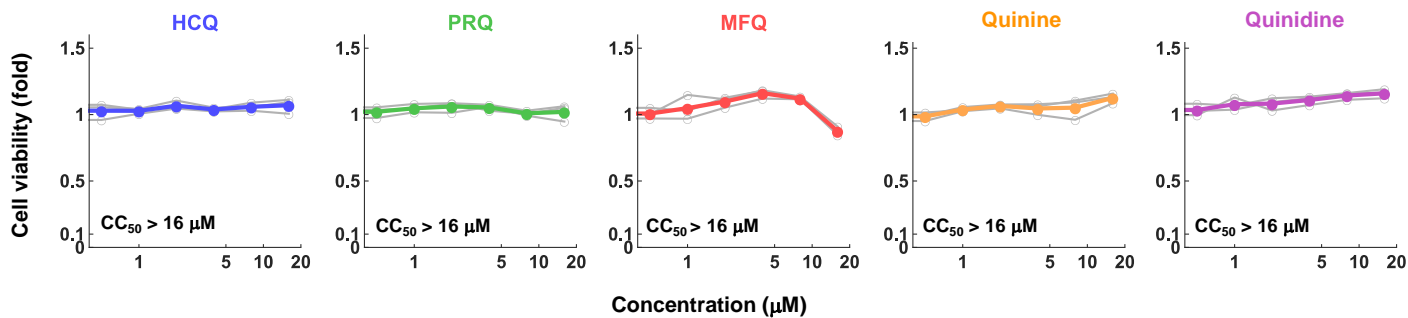

**A****SARS-CoV-2 lifecycle**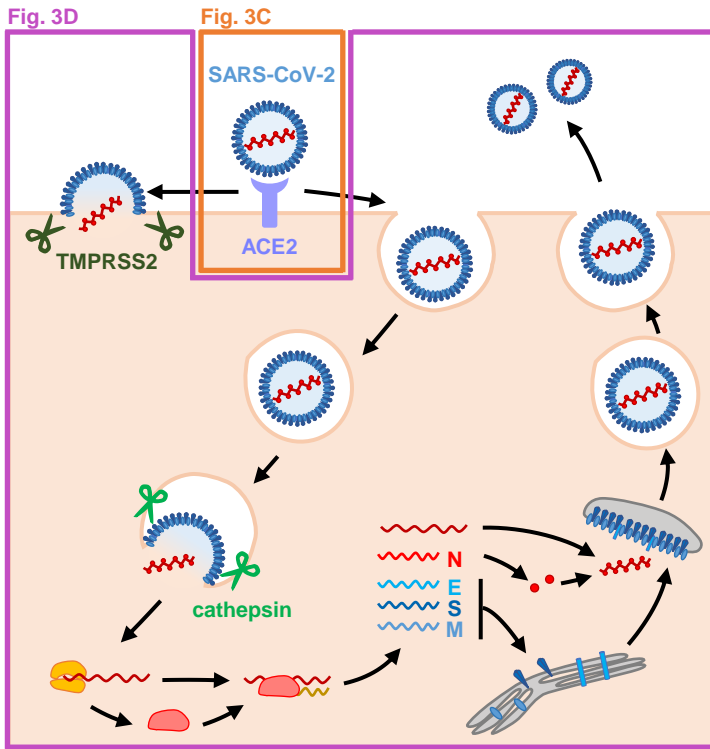**B****Time of addition analysis**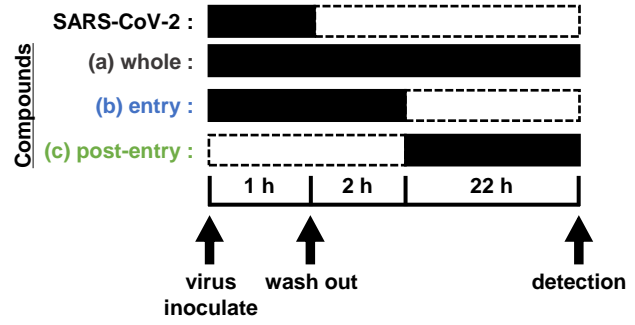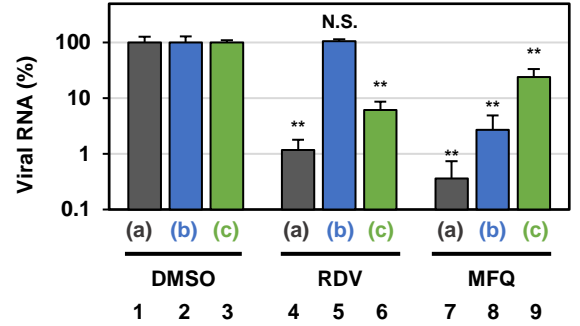**C****Virus-cell attachment**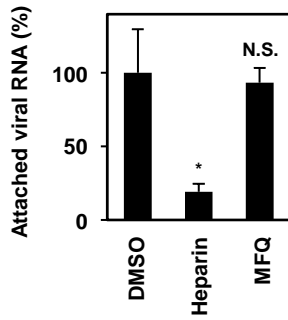**D****Post attachment**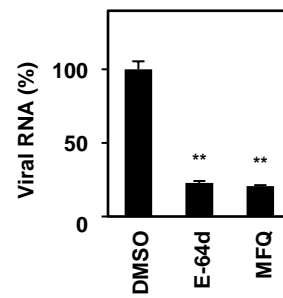**E****(I)****SARS-CoV-2 S**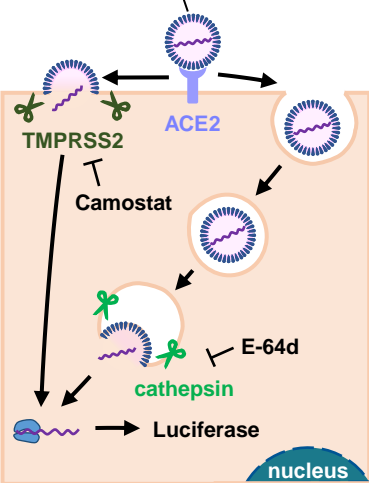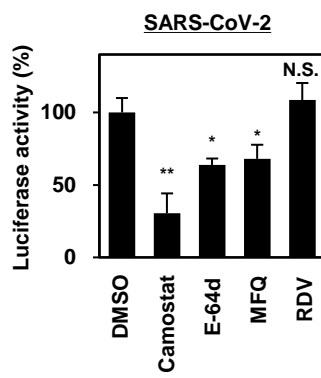**(II)****HCV E1/E2**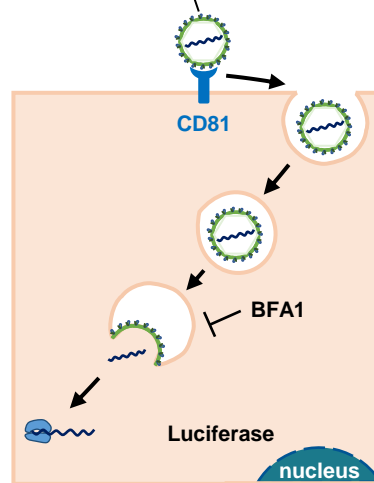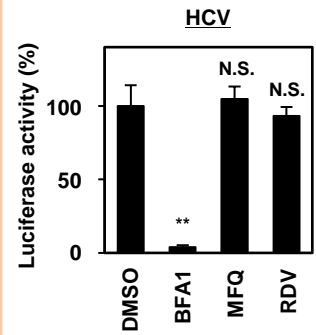

**A**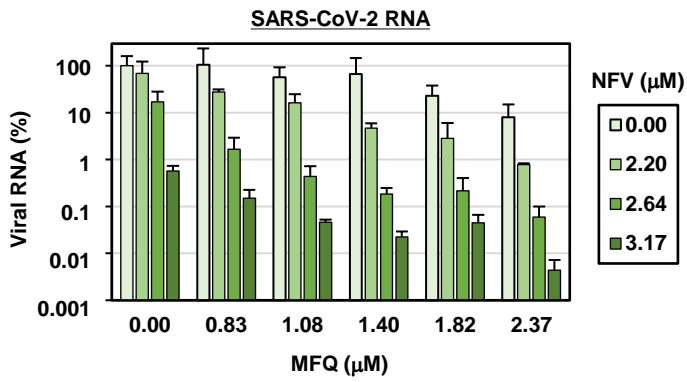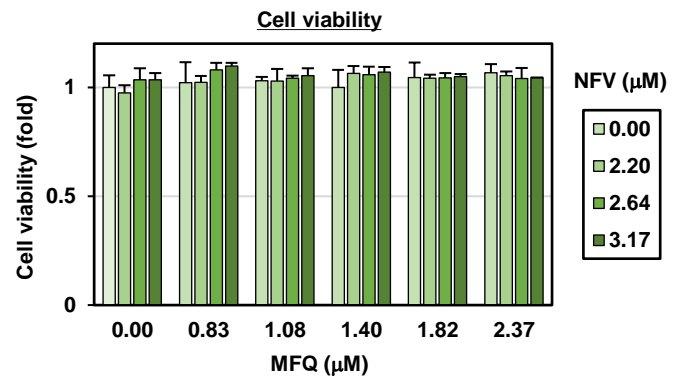**B**

**Synergy plot**

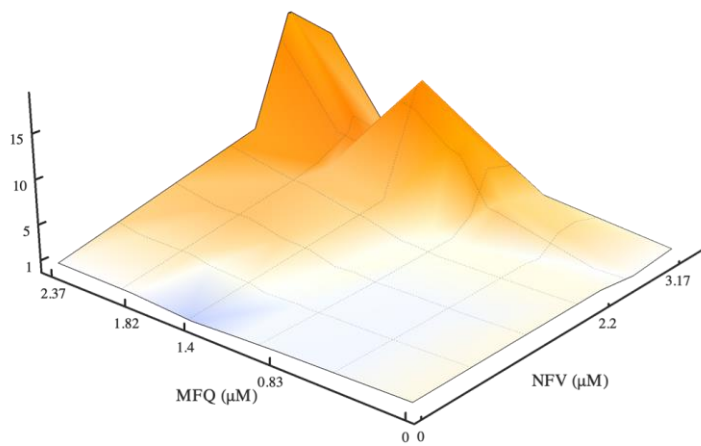

**A****Viral load in a patient**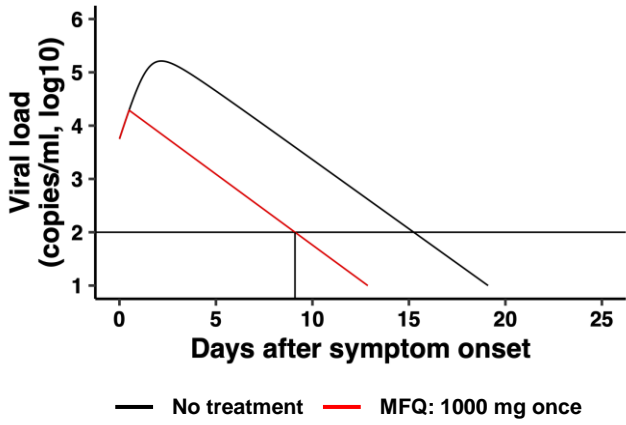**B****Activity of MFQ in a patient**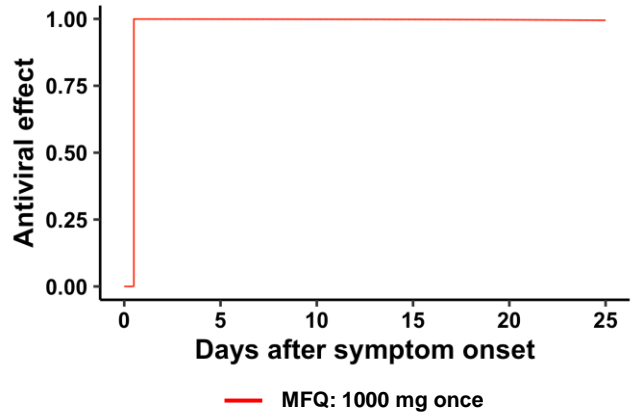**C****Cumulative viral load (copies/mL)**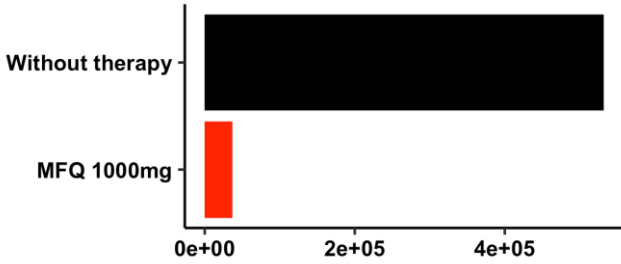**D****Duration of virus shedding (days)**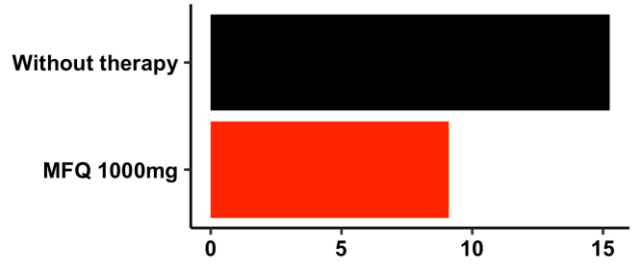

Source: https://www.biorxiv.org/content/10.1101/2020.11.19.389726.full.pdf
